# Supplementary material for: Measurement Report: Long-term Assessment of Primary and Secondary Organic Aerosols in Shanghai Megacity throughout China’s Clean Air Actions since 2010
Source: Copernicus journal article supplement (doi:10.5194/egusphere-2024-1488), 2024-06-24
Supplement: Supplementary file 1 [file egusphere-2024-1488-supplement.pdf]

*Supplement of*

**Long-term Assessment of Primary and Secondary Organic Aerosols in Shanghai Megacity throughout China's Clean Air Actions since 2010**

**Haifeng Yu et al.**

*Correspondence to:* Yunhua Chang (changy13@nuist.edu.cn; ORCID: 0000-0002-1622-5330) and Jianlin Hu (jianlinhu@nuist.edu.cn; ORCID: 0000-0002-5694-4794)

This file includes Figure S1 to Figure S14.

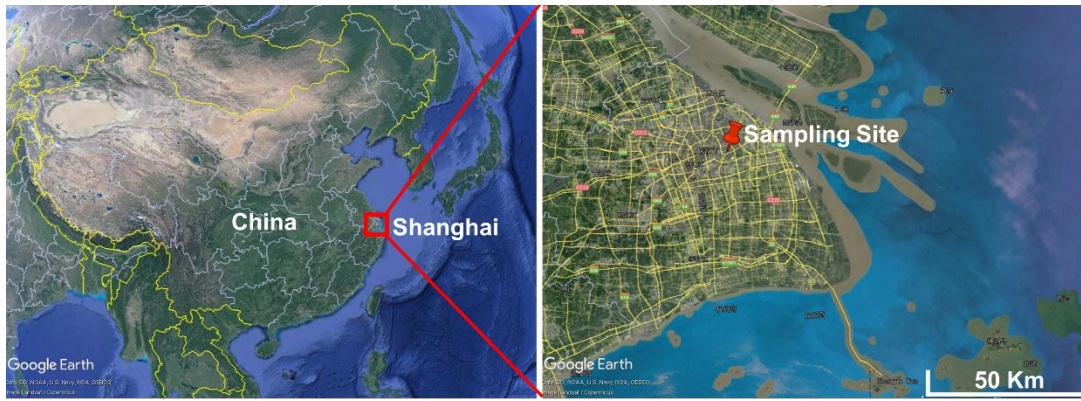

**Figure S1.** Location of the sampling site. The images were obtained from © Google Maps.

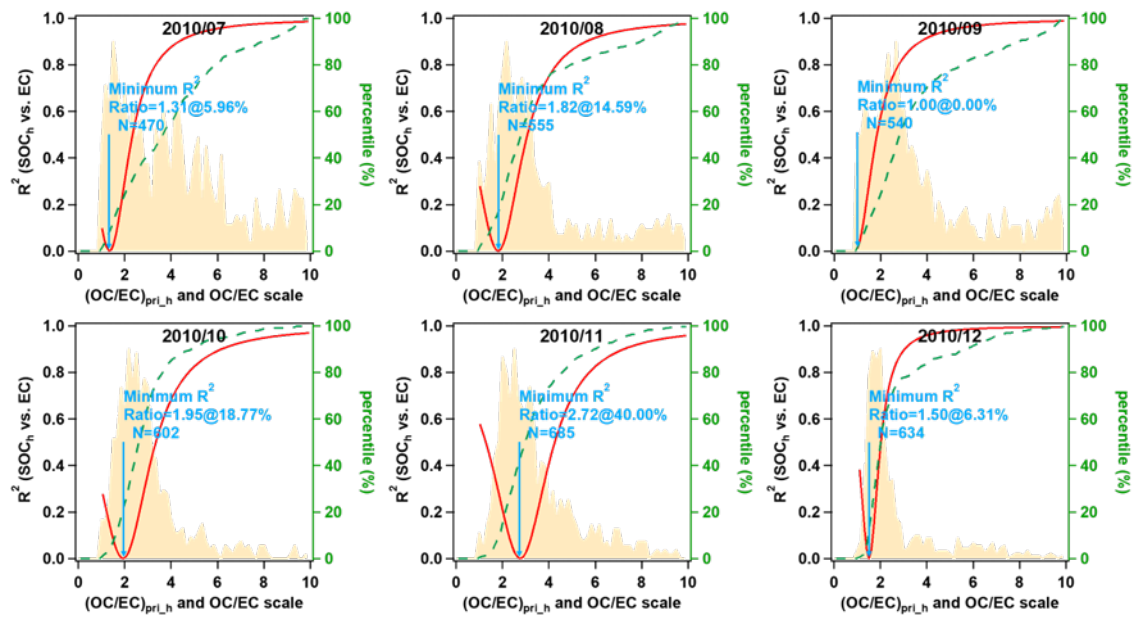

**Figure S2.** Illustration of  $(OC/EC)_{pri}$  estimation for each month in 2010. The red curve shows the correlation coefficient ( $R^2$ ) between SOC and EC as a function of assumed  $(OC/EC)_{pri}$  values. The shaded area represents the frequency distribution of the OC/EC ratio for the entire OC and EC data set. The green dashed curve displays the cumulative frequency curve of the OC/EC ratio.

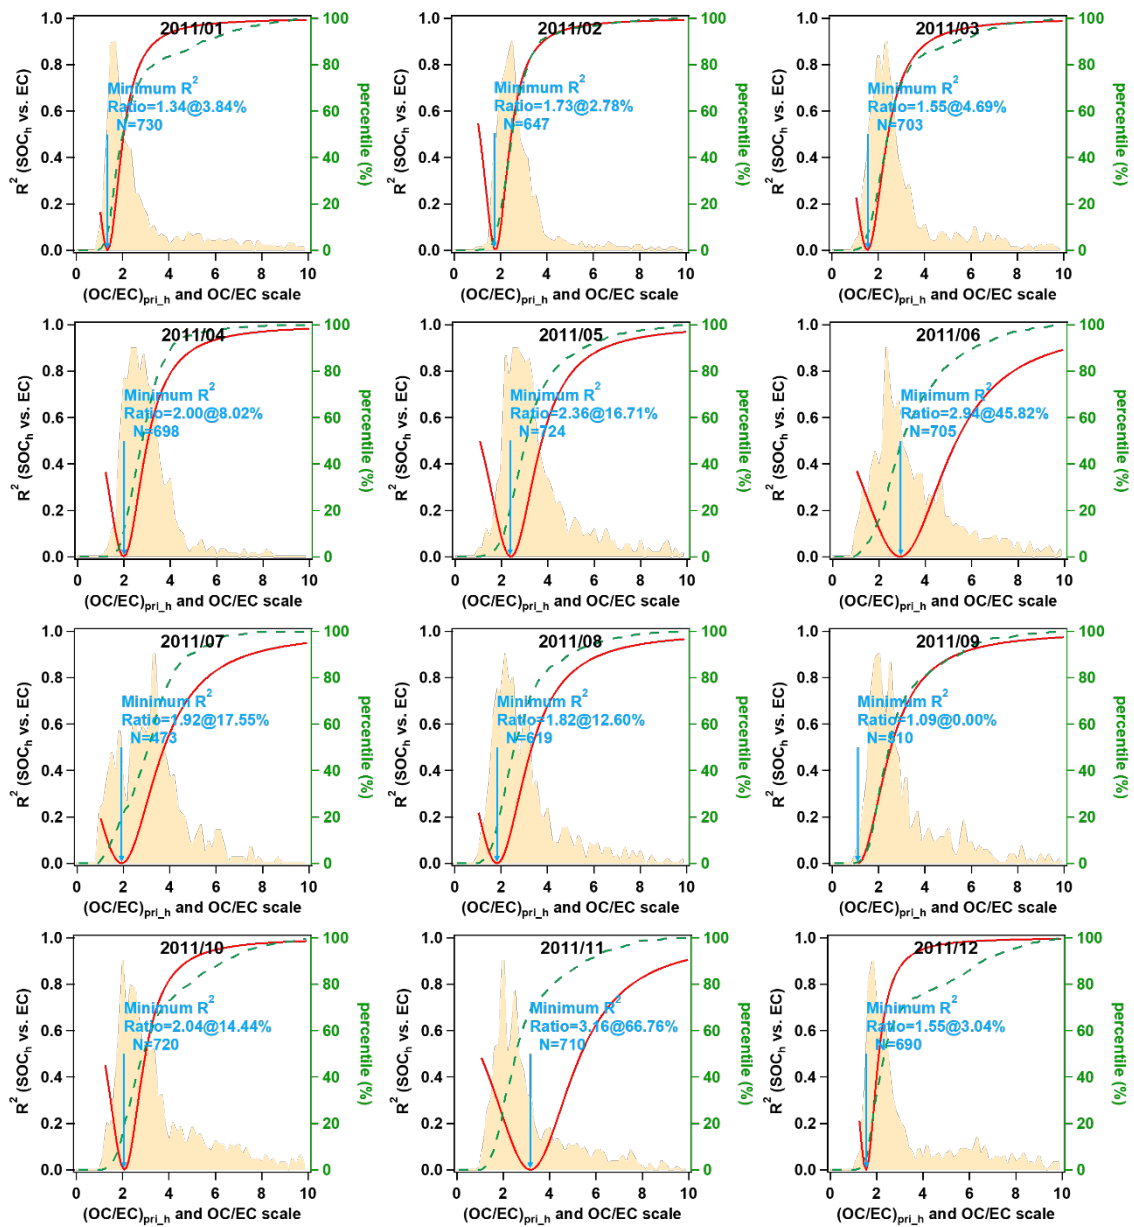

**Figure S3.** Illustration of  $(OC/EC)_{pri}$  estimation for each month in 2011. The red curve shows the correlation coefficient ( $R^2$ ) between SOC and EC as a function of assumed  $(OC/EC)_{pri}$  values. The shaded area represents the frequency distribution of the OC/EC ratio for the entire OC and EC data set. The green dashed curve displays the cumulative frequency curve of the OC/EC ratio.

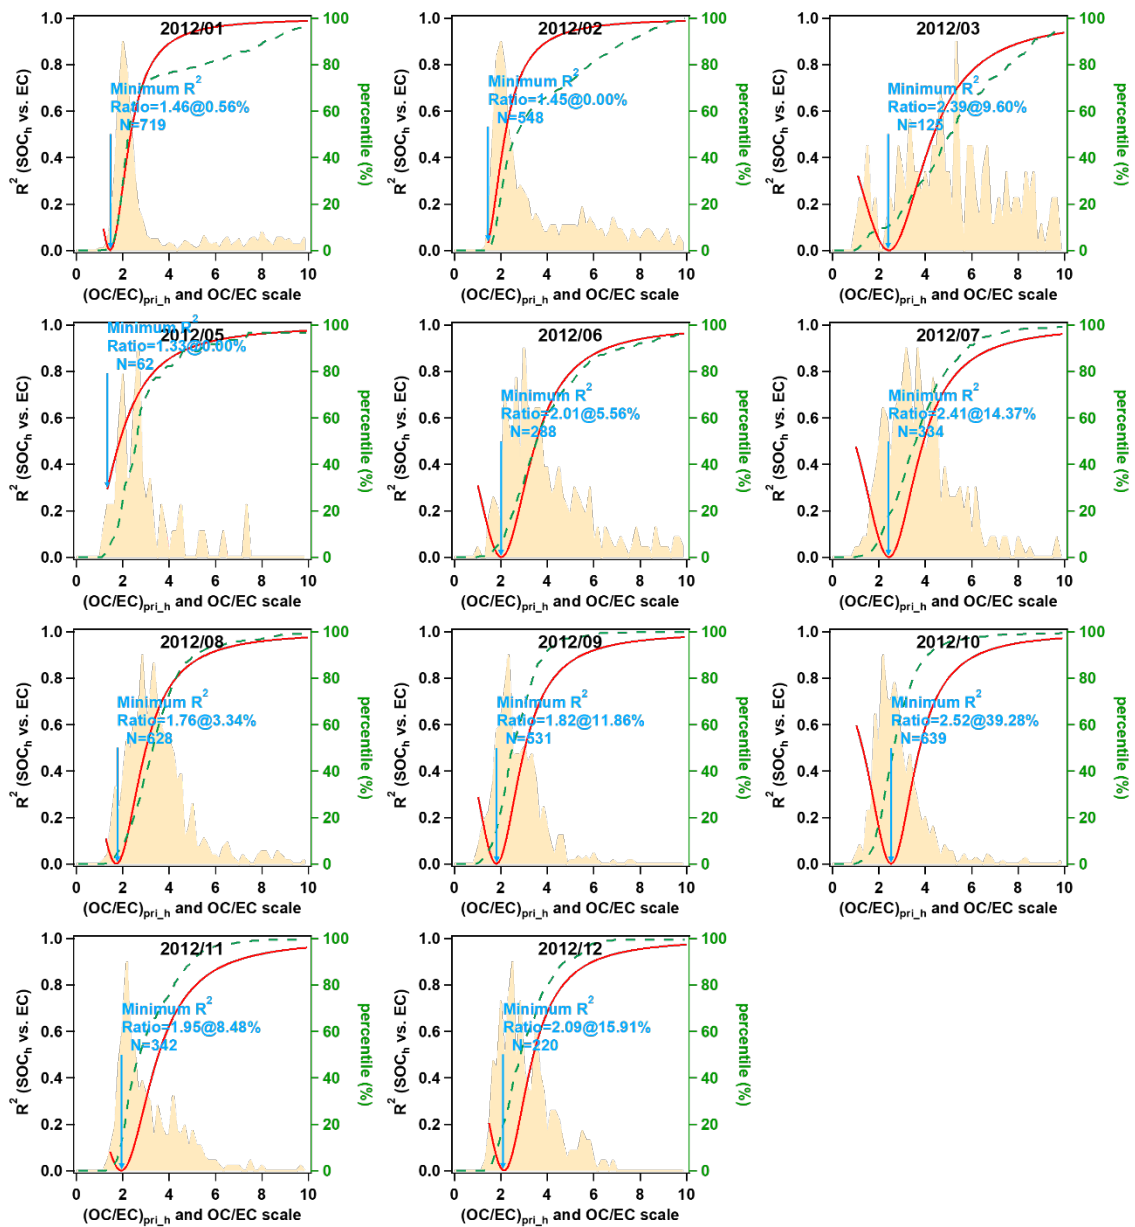

**Figure S4.** Illustration of  $(OC/EC)_{pri}$  estimation for each month in 2012. The red curve shows the correlation coefficient ( $R^2$ ) between SOC and EC as a function of assumed  $(OC/EC)_{pri}$  values. The shaded area represents the frequency distribution of the OC/EC ratio for the entire OC and EC data set. The green dashed curve displays the cumulative frequency curve of the OC/EC ratio.

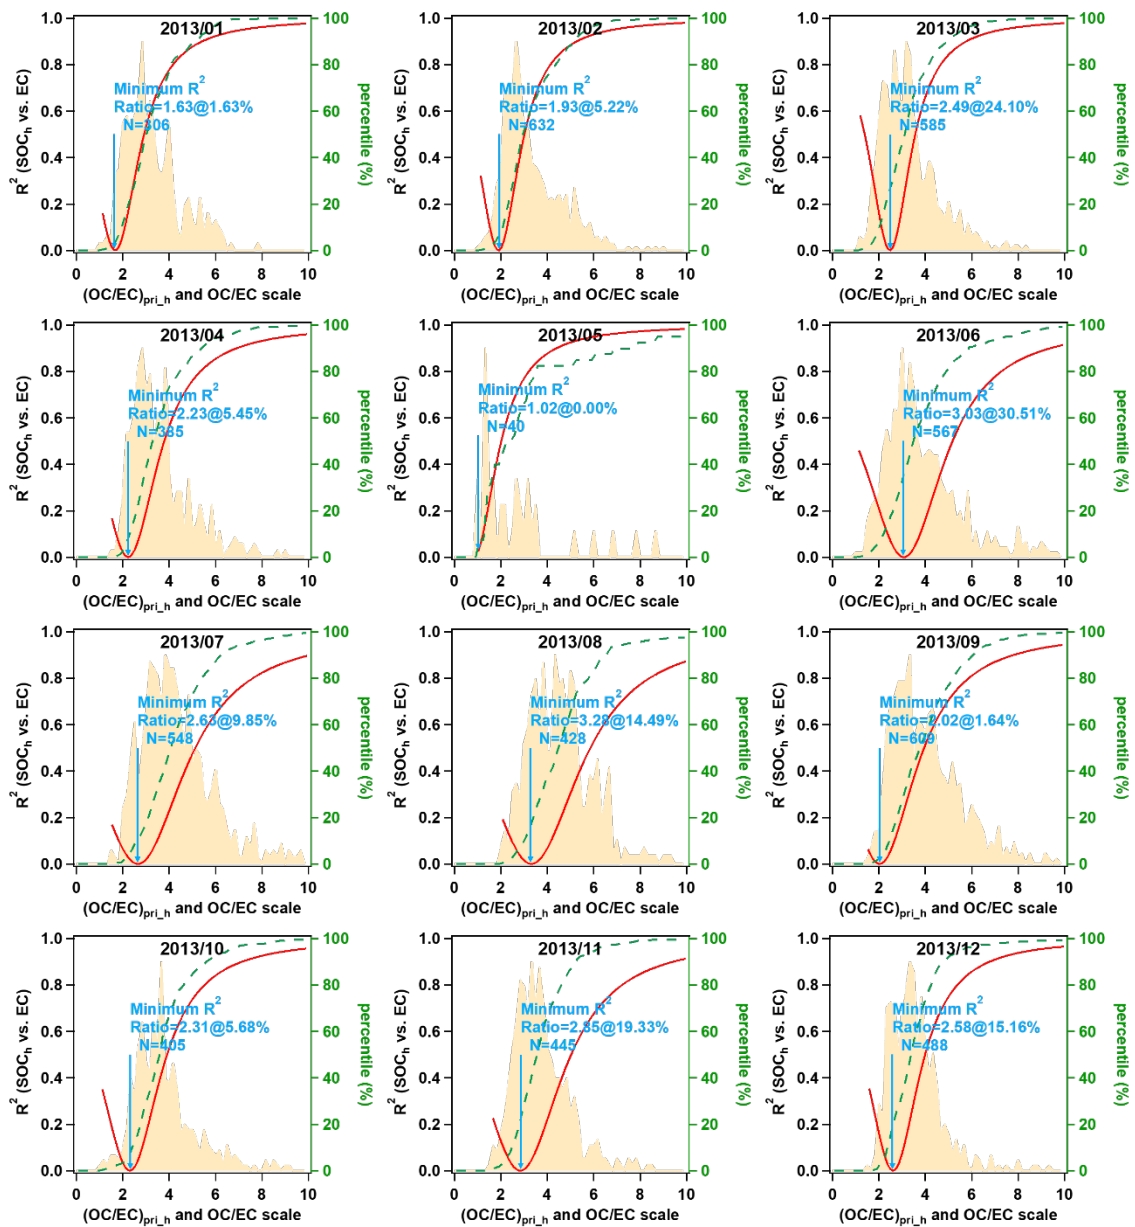

**Figure S5.** Illustration of  $(OC/EC)_{pri}$  estimation for each month in 2013. The red curve shows the correlation coefficient ( $R^2$ ) between SOC and EC as a function of assumed  $(OC/EC)_{pri}$  values. The shaded area represents the frequency distribution of the OC/EC ratio for the entire OC and EC data set. The green dashed curve displays the cumulative frequency curve of the OC/EC ratio.

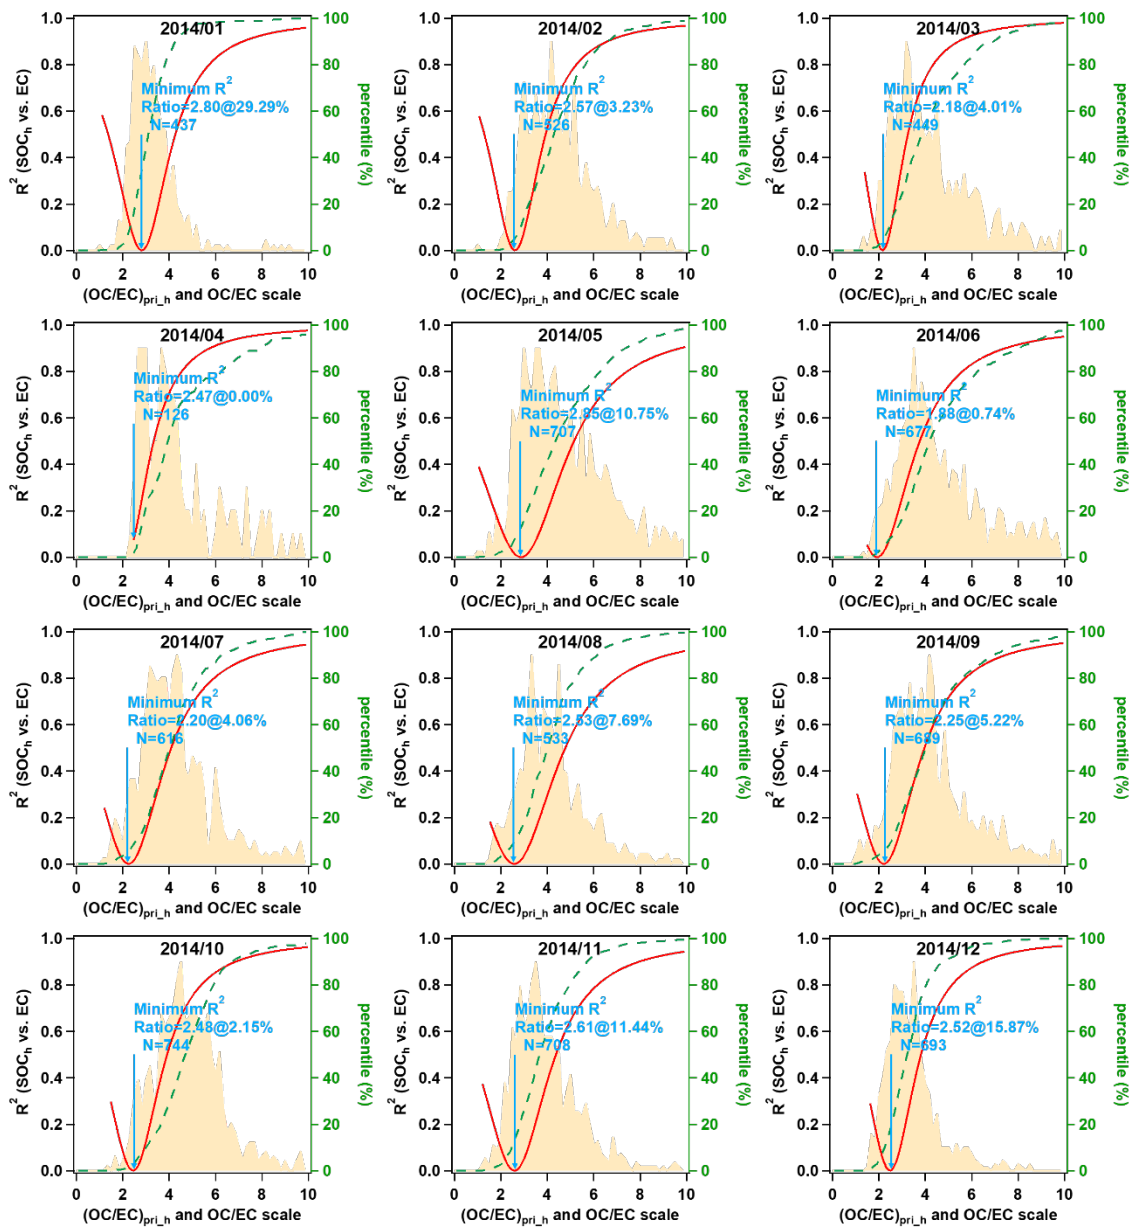

**Figure S6.** Illustration of  $(OC/EC)_{pri}$  estimation for each month in 2014. The red curve shows the correlation coefficient ( $R^2$ ) between SOC and EC as a function of assumed  $(OC/EC)_{pri}$  values. The shaded area represents the frequency distribution of the OC/EC ratio for the entire OC and EC data set. The green dashed curve displays the cumulative frequency curve of the OC/EC ratio.

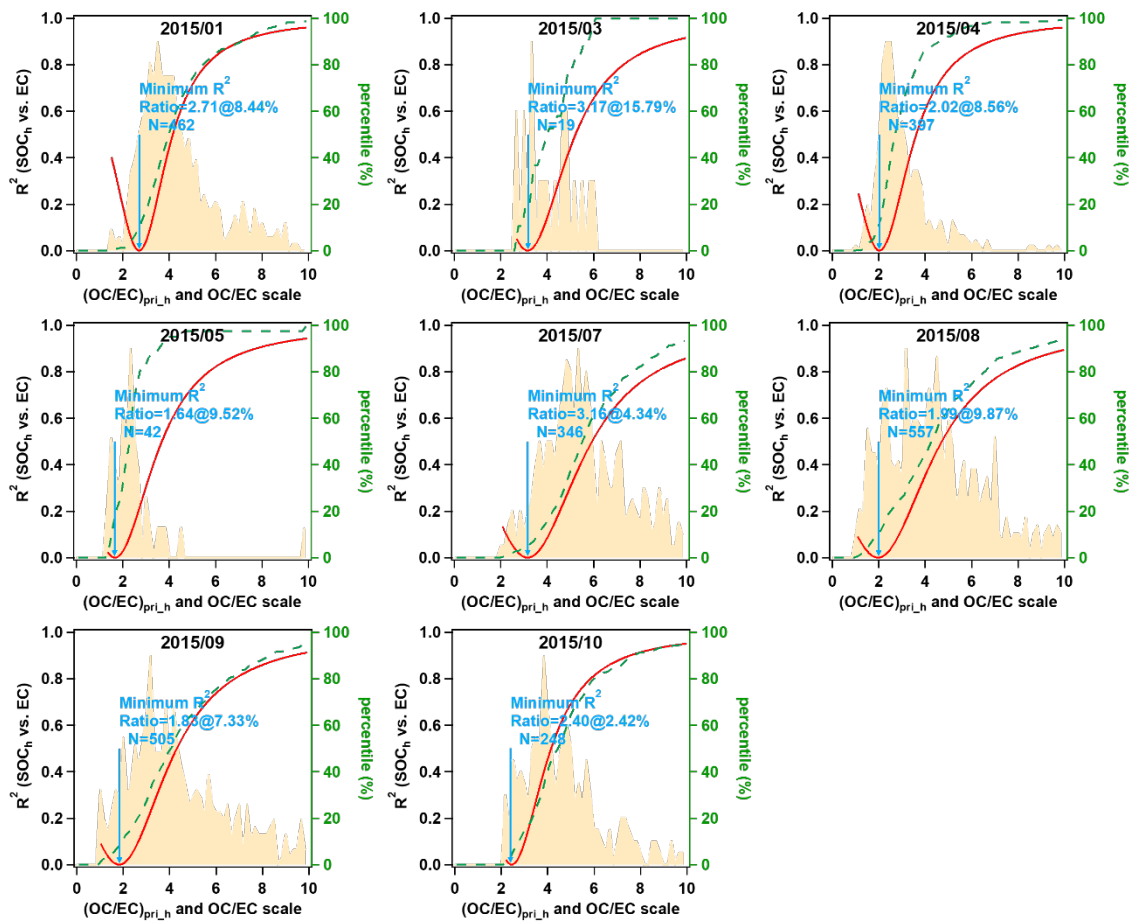

**Figure S7.** Illustration of  $(OC/EC)_{pri}$  estimation for each month in 2015. The red curve shows the correlation coefficient ( $R^2$ ) between SOC and EC as a function of assumed  $(OC/EC)_{pri}$  values. The shaded area represents the frequency distribution of the OC/EC ratio for the entire OC and EC data set. The green dashed curve displays the cumulative frequency curve of the OC/EC ratio.



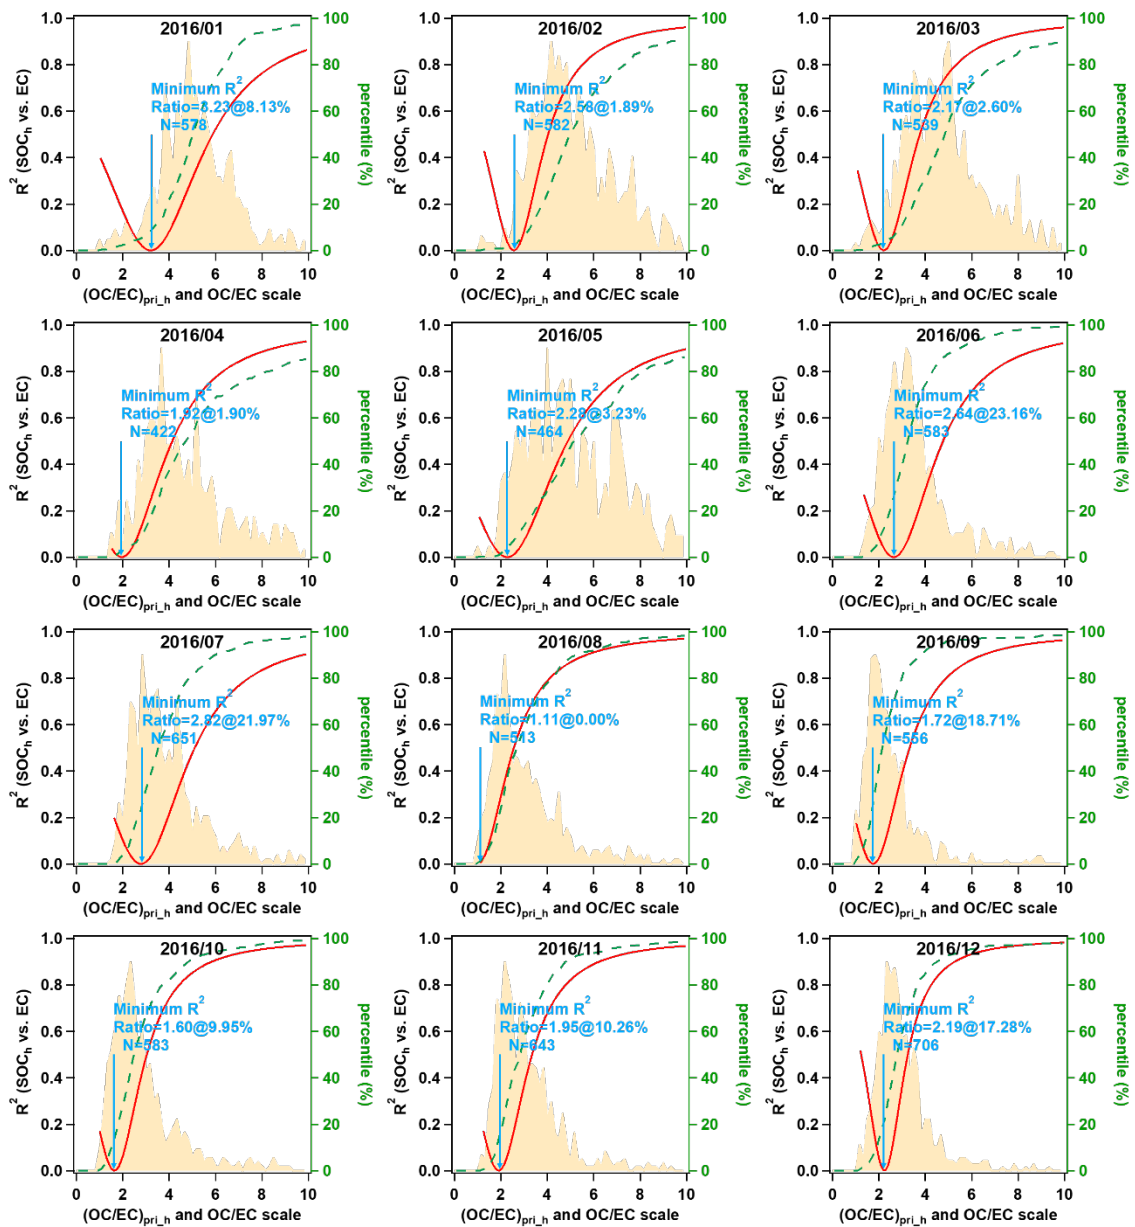

**Figure S8.** Illustration of  $(OC/EC)_{pri}$  estimation for each month in 2016. The red curve shows the correlation coefficient ( $R^2$ ) between SOC and EC as a function of assumed  $(OC/EC)_{pri}$  values. The shaded area represents the frequency distribution of the OC/EC ratio for the entire OC and EC data set. The green dashed curve displays the cumulative frequency curve of the OC/EC ratio.

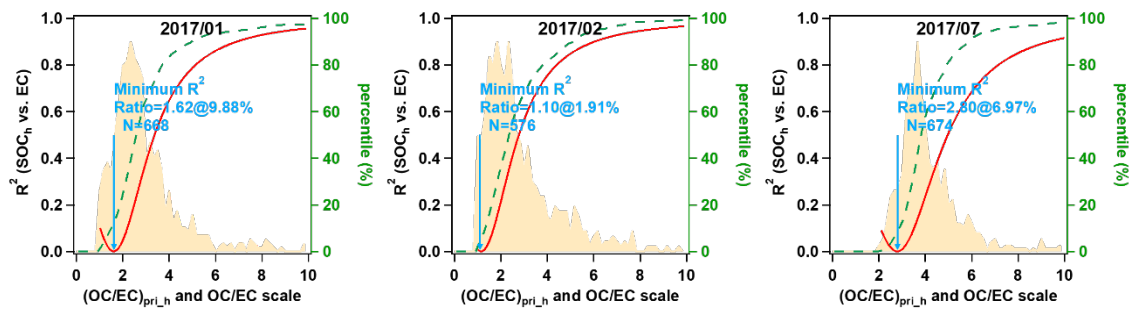

**Figure S9.** Illustration of  $(OC/EC)_{pri}$  estimation for each month in **2017**. The red curve shows the correlation coefficient ( $R^2$ ) between SOC and EC as a function of assumed  $(OC/EC)_{pri}$  values. The shaded area represents the frequency distribution of the OC/EC ratio for the entire OC and EC data set. The green dashed curve displays the cumulative frequency curve of the OC/EC ratio.

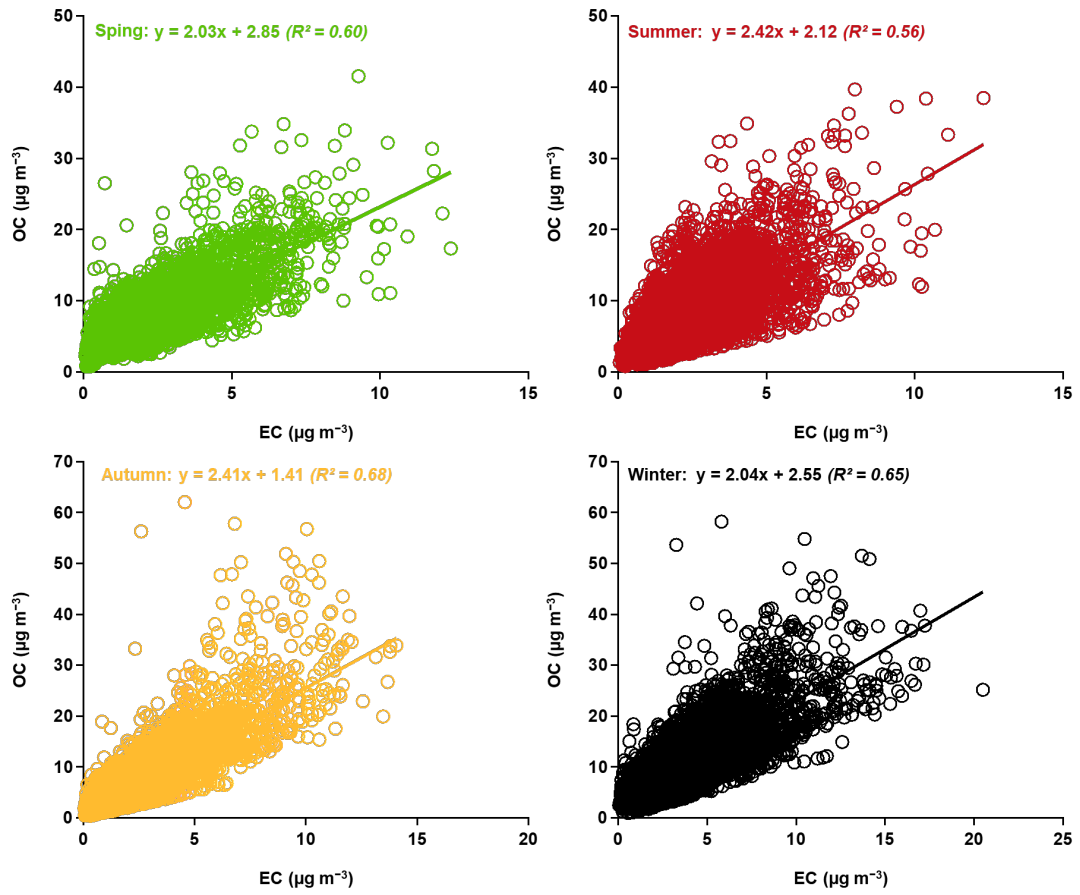

**Figure S10.** Correlation between EC and OC mass concentrations during different seasons.

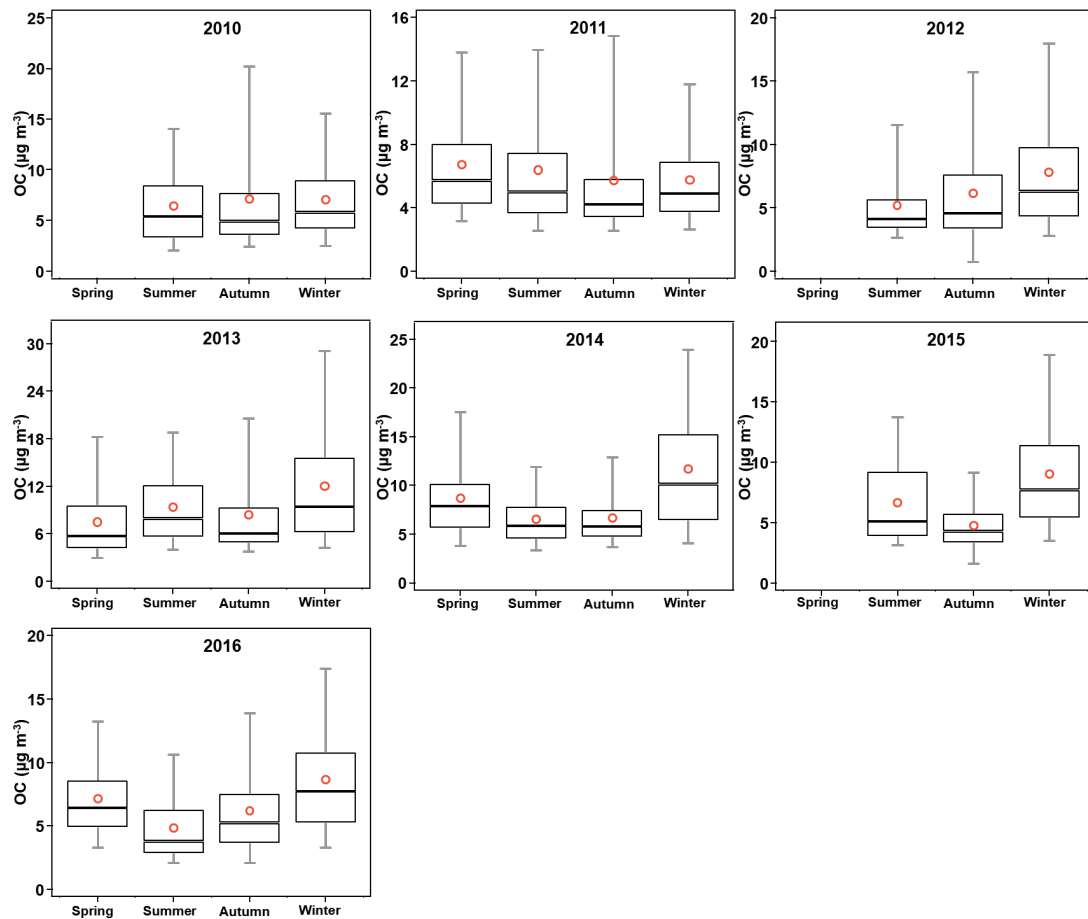

**Figure S11.** 2010-2016 OC concentrations in different seasons (spring: March, April, May; summer: June, July, August; fall: September, October, November; winter: December, January, February). 2017 only has summer data so seasonal changes are not discussed.

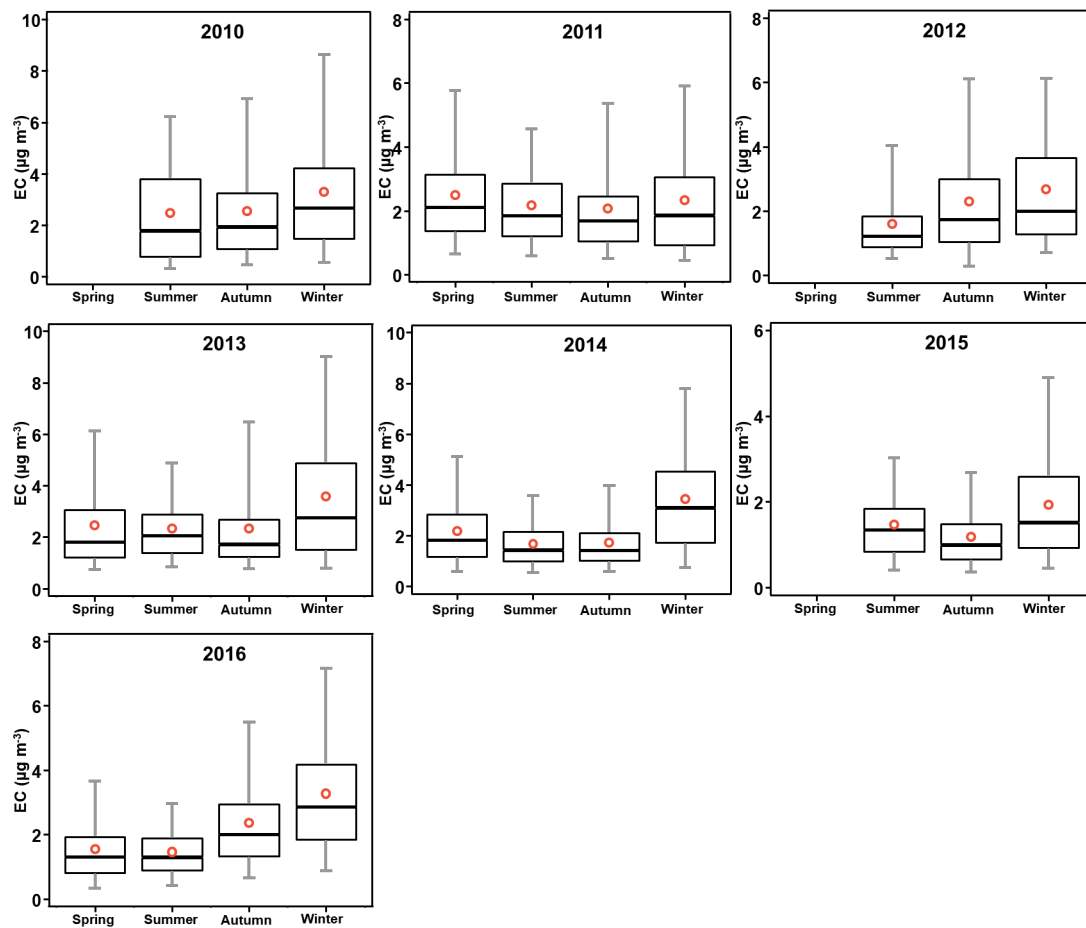

**Figure S12.** 2010-2016 EC concentrations in different seasons (spring: March, April, May; summer: June, July, August; fall: September, October, November; winter: December, January, February). 2017 only has summer data so seasonal changes are not discussed.

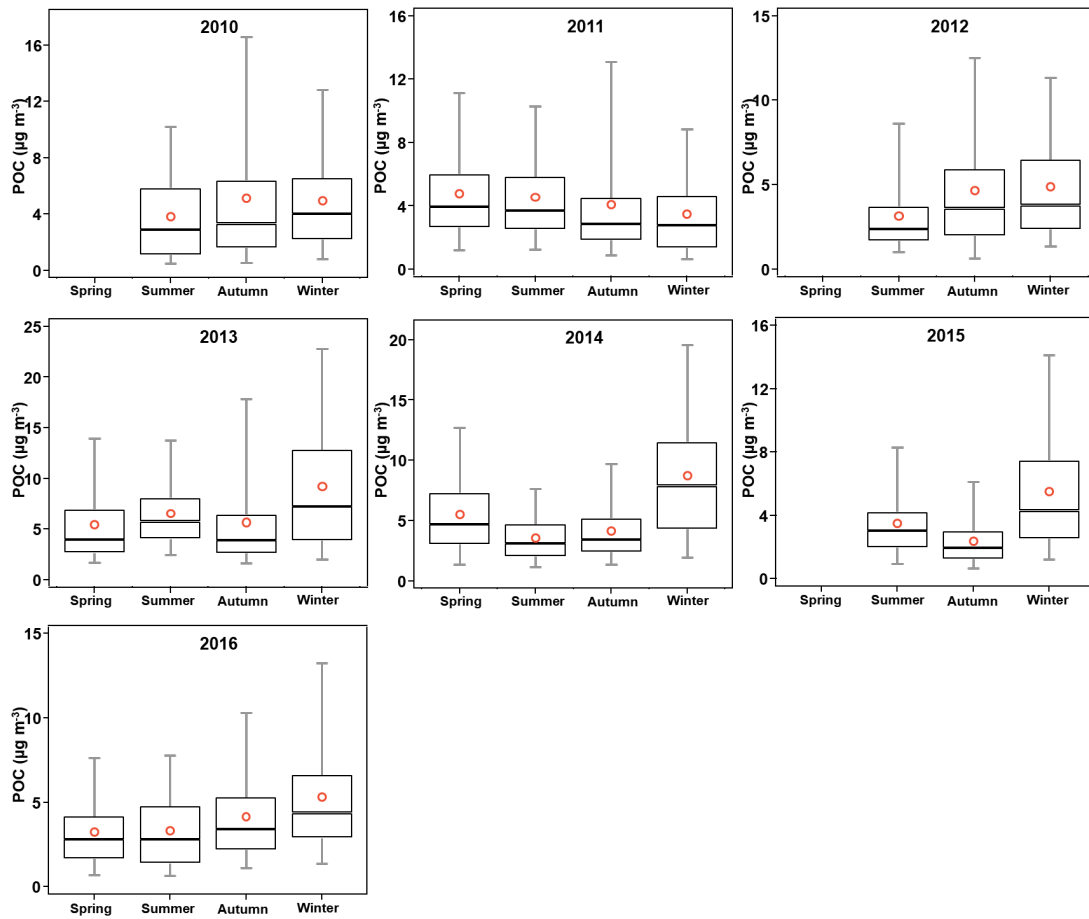

**Figure S13.** 2010-2016 POC concentrations in different seasons (spring: March, April, May; summer: June, July, August; fall: September, October, November; winter: December, January, February). 2017 only has summer data so seasonal changes are not discussed.

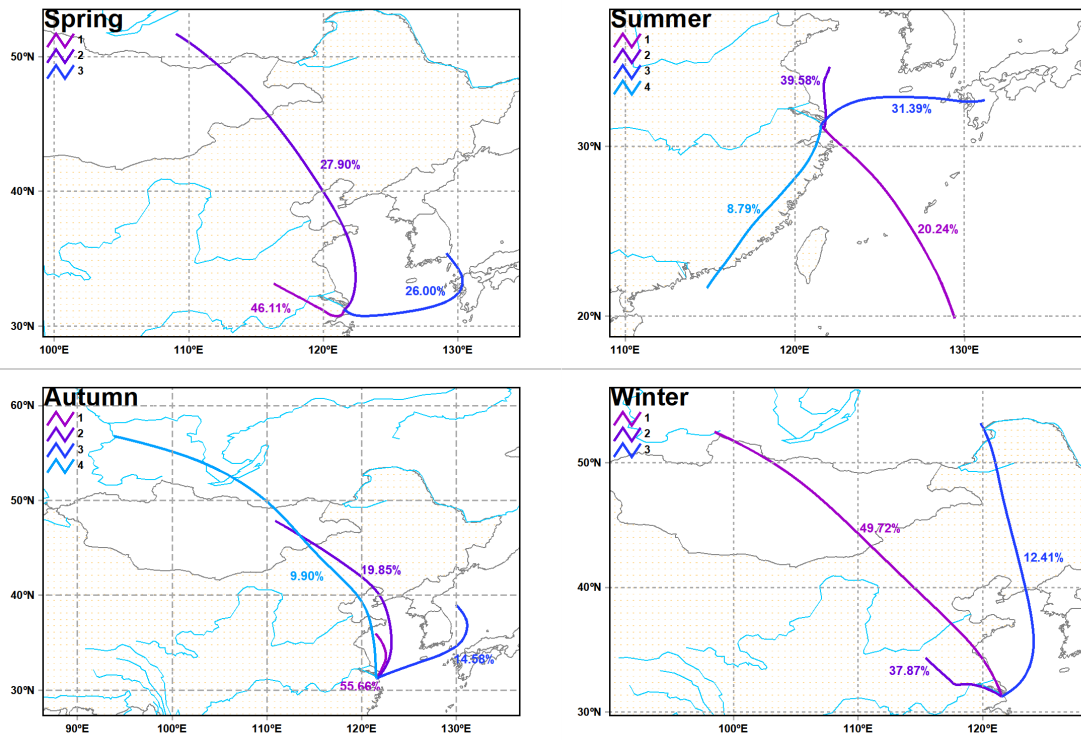

Figure S14. 72h backward trajectories for four seasons in 2014.
